# Supplementary material for: Determining the Composite Structure of Au-Fe-Based Submicrometre Spherical Particles Fabricated by Pulsed-Laser Melting in Liquid
Source: PubMed Central journal article supplement (PMC6409745; doi:10.3390/nano9020198), 2019-02-03
Supplement: nanomaterials-09-00198-s001.pdf [file nanomaterials-09-00198-s001.pdf]

## Determining the composite structure of Au-Fe-based submicrometer spherical particles fabricated by pulsed-laser melting in liquid

Hokuto Fuse <sup>1</sup>, Naoto Koshizaki <sup>1\*</sup>, Yoshie Ishikawa <sup>2</sup>, and Zaneta Swiatkowska-Warkocka<sup>3</sup>

<sup>1</sup> Graduate School of Engineering, Hokkaido University, Sapporo, Hokkaido 060-8628, Japan; ttx-ken@frontier.hokudai.ac.jp, koshizaki.naoto@eng.hokudai.ac.jp

<sup>2</sup> Nanomaterials Research Institute, National Institute of Advanced Industrial Science and Technology (AIST), Tsukuba, Ibaraki 305-8565, Japan; ishikawa.yoshie@aist.go.jp

<sup>3</sup> Institute of Nuclear Physics, Polish Academy of Sciences, Kraków, PL-31342, Poland; swiatkow@wp.pl

\* Correspondence: koshizaki.naoto@eng.hokudai.ac.jp, +81-11-706-5594

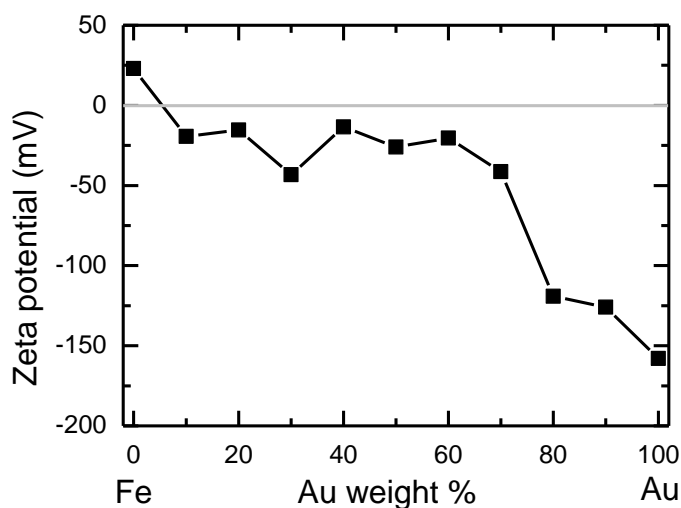

**Figure S1.** Zeta potential of the mixed solution of Au and Fe<sub>2</sub>O<sub>3</sub> nanoparticles before laser irradiation. Most of the concentration range zeta potentials were from -50 mV to 0 mV.

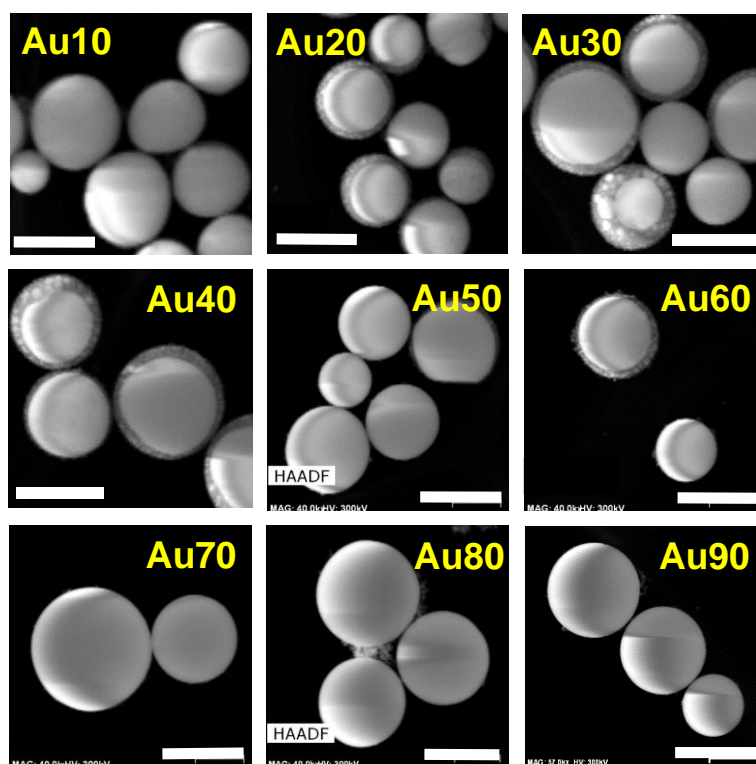

**Figure S2.** HAADF-STEM images of particles obtained with different mixing ratios of raw nanoparticle solutions of Au and  $\text{Fe}_2\text{O}_3$ . “Au10” indicates Au 10%:Fe 90% in weight. All scale bars are 500 nm.

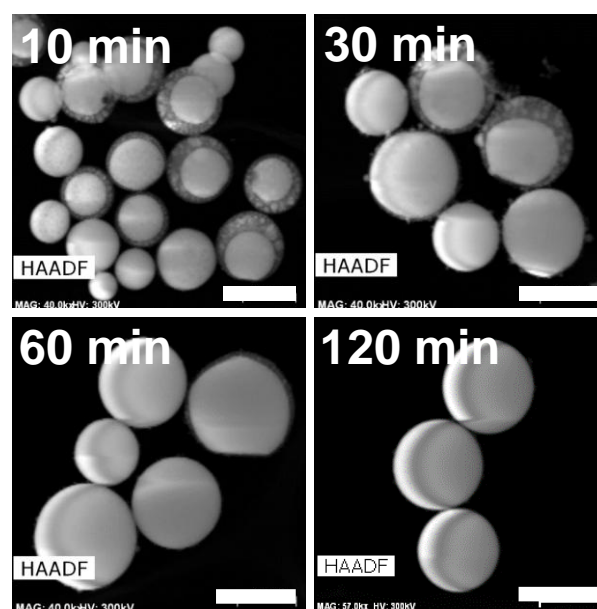

**Figure S3.** HAADF-STEM images of particles obtained by different laser irradiation times from the Au50 raw particle solution. All scale bars are 500 nm.

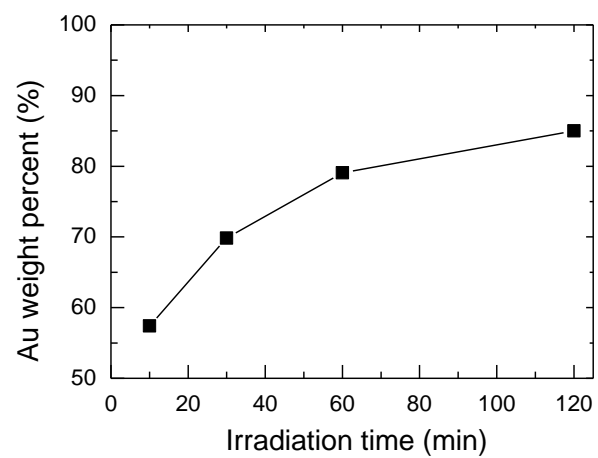

**Figure S4.** Au weight percent change in the produced submicrometer particles with the laser irradiation time for Au50.
